# Supplementary material
Source: publisher site journal article supplement (http://kjim.org/upload/media/kjim-2022-396-Supplementary-Table-1.pdf)
Supplement: Supplementary file 1 [file kjim-2022-396-Supplementary-Table-1.pdf]

**Supplementary Table 1. Gene list**

---

|        |
|--------|
| ABL1   |
| ASXL1  |
| ATM    |
| BCOR   |
| BRAF   |
| CALR   |
| CBL    |
| CDKN2A |
| CEBPA  |
| CREBBP |
| CSF3R  |
| DDX41  |
| DNMT3A |
| ETV6   |
| EZH2   |
| FBXW7  |
| FLT3   |
| GATA2  |
| IDH1   |
| IDH2   |
| IKZF1  |
| JAK1   |
| JAK2   |
| JAK3   |
| KDM6A  |
| KIT    |
| KMT2A  |
| KRAS   |
| MECOM  |
| MPL    |
| MYD88  |
| NF1    |
| NOTCH1 |
| NPM1   |
| NRAS   |
| PDGFRA |
| PDGFRB |
| PHF6   |
| PTPN11 |
| RB1    |
| RUNX1  |
| SETBP1 |

---

**Supplementary Table 1. Continued**

---

|       |
|-------|
| SF3B1 |
| SMC1A |
| SRSF2 |
| STAG2 |
| TET2  |
| TP53  |
| U2AF1 |
| WT1   |
| ZRSR2 |

---
